# Supplementary material
Source: ML conference proceedings conference paper supplement (https://openaccess.thecvf.com/content/CVPR2026/html/Xu_Towards_Unified_Human_CVPR_2026_paper.html)
Supplement: Supplementary file 1 [file Xu_Towards_Unified_Human_CVPR_2026_supplemental.pdf]

## A. Additional Results

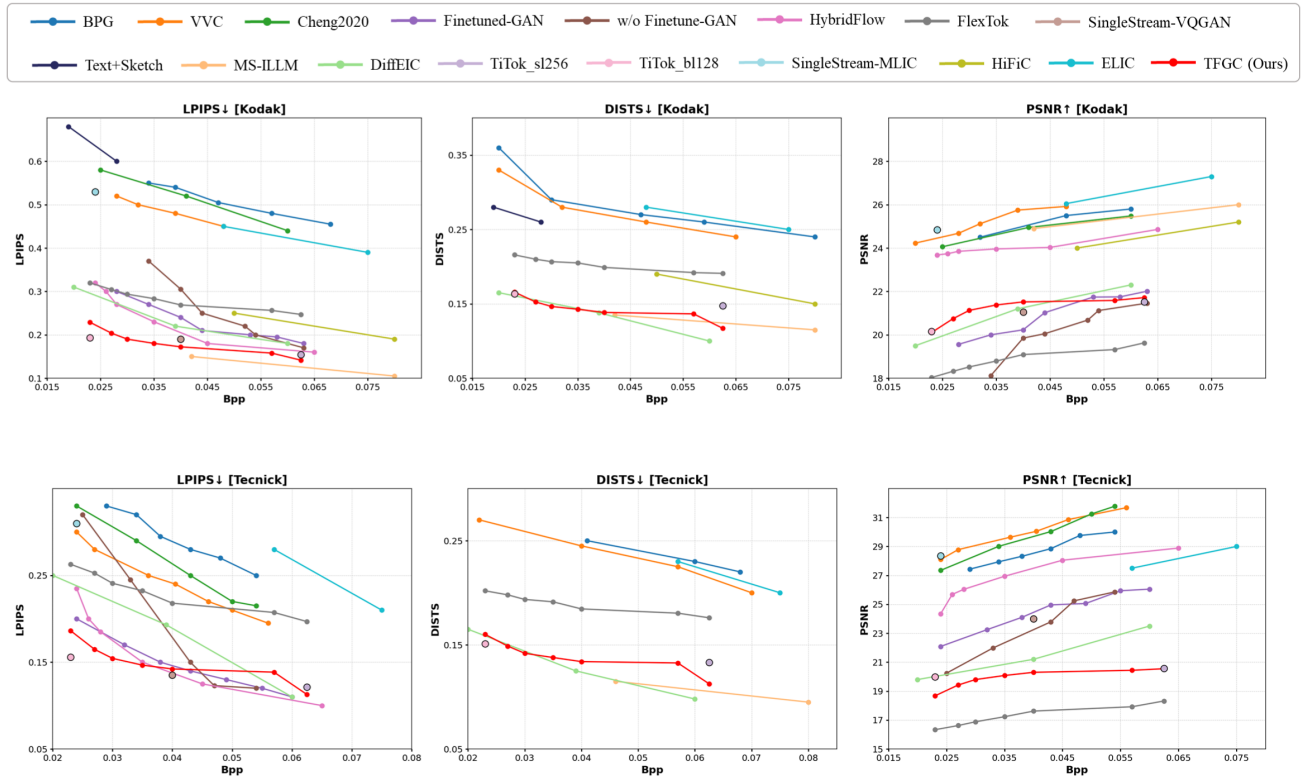

Figure 7. Quantitative comparison using PSNR $\uparrow$ , LPIPS $\downarrow$  [73], DISTS $\downarrow$  [13] on the Kodak [18] and Tecnick [2] datasets. Results for BPG [5], VVC [7], Cheng2020 [11], Finetuned-GAN [50], w/o Fine-tune [50], HybridFlow [47], FlexTok [3], ELIC [23], HiFiC [52], Text+Sketch [33], MS-ILLM [55], DiffEIC [41], TiTok\_sl256 [69], TiTok\_bl128 [69], SingleStream-MLIC [28], SingleStream-VQGAN [15]. Baseline numbers were taken from the [41, 47].

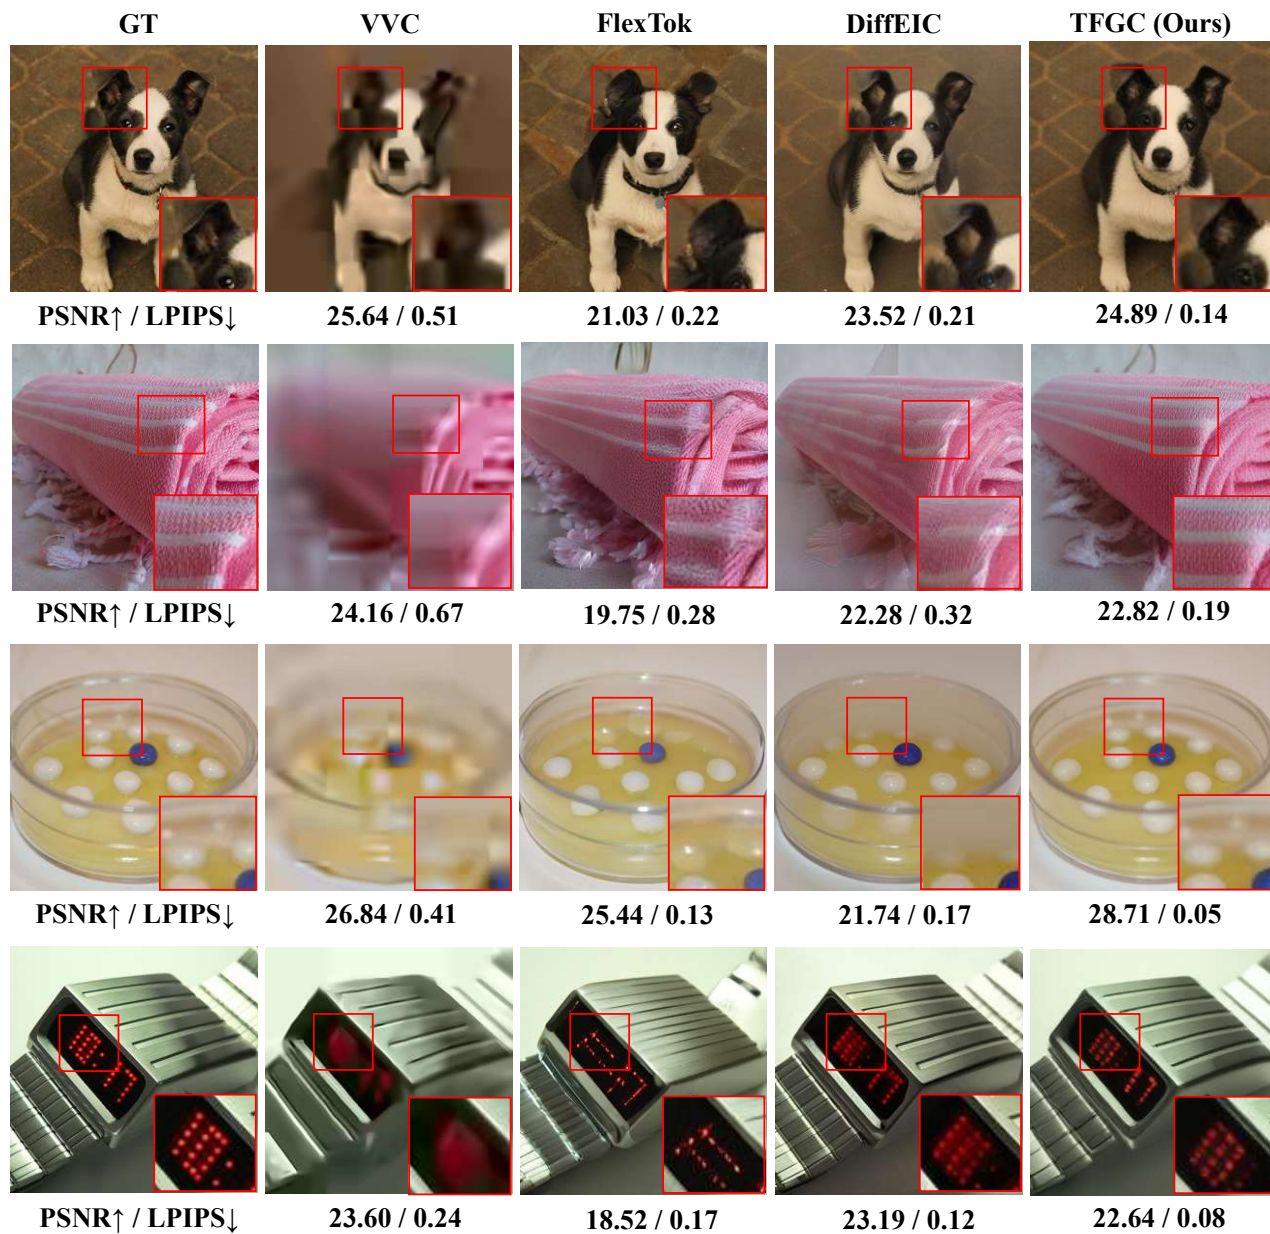

Figure 8. Visualization results of our method and other baselines at 0.04 bpp on human-oriented benchmarks. GT denotes the ground-truth. The corresponding PSNR↑ and LPIPS↓ metrics are reported above.

Table 7. Results on Caption benchmarks. “Var.” denotes whether a single model supports variable bitrate control, and “Ave. Bpp” represents the average bits per pixel across all datasets. Each group corresponds to a specific bitrate range, with bitrate variation constrained within  $\pm 0.005$  bpp. **Bold** and underlined denote the best and second-best results, respectively.

| Methods                     | Ave. Bpp | Var.         | Param. | MSCOCO            |                    |                  | Flickr30k         |                    |                  |
|-----------------------------|----------|--------------|--------|-------------------|--------------------|------------------|-------------------|--------------------|------------------|
|                             |          |              |        | BLEU-4 $\uparrow$ | ROUGE-L $\uparrow$ | CIDEr $\uparrow$ | BLEU-4 $\uparrow$ | ROUGE-L $\uparrow$ | CIDEr $\uparrow$ |
| VVC [7]                     | 0.065    | –            | –      | 7.36              | 33.44              | 14.31            | 7.51              | 32.02              | 12.33            |
| TiTok <sub>sl256</sub> [69] | 0.063    | $\times$     | 330M   | <u>13.45</u>      | <u>42.31</u>       | <u>33.53</u>     | 11.10             | 37.06              | 17.15            |
| DiffEIC [41]                | 0.062    | $\times$     | 1380M  | 11.42             | 39.00              | 16.45            | <u>12.45</u>      | <u>38.60</u>       | 19.75            |
| ELIC [23]                   | 0.059    | $\times$     | 34M    | 11.80             | 39.80              | 23.22            | –                 | –                  | –                |
| FlexTok [3]                 | 0.063    | $\checkmark$ | 950M   | 10.91             | 39.10              | 22.27            | 10.52             | 36.78              | <u>20.55</u>     |
| <b>TFGC (Ours)</b>          | 0.063    | $\checkmark$ | 332M   | <b>24.90</b>      | <b>49.94</b>       | <b>82.73</b>     | <b>14.12</b>      | <b>39.04</b>       | <b>27.29</b>     |
| VVC [7]                     | 0.045    | –            | –      | 5.63              | 31.34              | 14.31            | 6.55              | 30.34              | 10.56            |
| DiffEIC [41]                | 0.040    | $\times$     | 1380M  | <u>11.03</u>      | 38.60              | 15.63            | <u>11.53</u>      | <u>37.25</u>       | 17.83            |
| FlexTok [3]                 | 0.035    | $\checkmark$ | 950M   | 10.60             | <u>38.62</u>       | <u>21.51</u>     | 10.11             | 36.25              | <u>18.68</u>     |
| <b>TFGC (Ours)</b>          | 0.035    | $\checkmark$ | 332M   | <b>24.60</b>      | <b>49.76</b>       | <b>81.81</b>     | <b>13.59</b>      | <b>38.72</b>       | <b>26.97</b>     |
| VVC [7]                     | 0.024    | –            | –      | 2.40              | 26.40              | 3.12             | 2.83              | 25.51              | 3.34             |
| TiTok <sub>bl128</sub> [69] | 0.023    | $\times$     | 390M   | <u>12.68</u>      | <u>41.43</u>       | <u>31.99</u>     | <u>10.23</u>      | <u>35.93</u>       | 15.88            |
| DiffEIC [41]                | 0.022    | $\times$     | 1380M  | 10.52             | 37.90              | 14.52            | 9.66              | 34.44              | 13.85            |
| FlexTok [3]                 | 0.023    | $\checkmark$ | 950M   | 10.22             | 38.07              | 21.08            | 9.89              | 35.63              | <u>17.52</u>     |
| <b>TFGC (Ours)</b>          | 0.023    | $\checkmark$ | 332M   | <b>23.09</b>      | <b>48.32</b>       | <b>74.96</b>     | <b>12.80</b>      | <b>37.60</b>       | <b>24.00</b>     |

Table 8. Results on Vision Grounding benchmarks. “Var.” denotes whether a single model supports variable bitrate control, and “Ave. Bpp” represents the average bits per pixel across all datasets. Each group corresponds to a specific bitrate range, with bitrate variation constrained within  $\pm 0.005$  bpp. **Bold** and underlined denote the best and second-best results, respectively.

| Methods                     | Ave. Bpp | Var.         | Param. | Refcoco (Acc@0.5 $\uparrow$ ) |              | Refcocog (Acc@0.5 $\uparrow$ ) |              |
|-----------------------------|----------|--------------|--------|-------------------------------|--------------|--------------------------------|--------------|
|                             |          |              |        | val                           | test         | val                            | test         |
| VVC [7]                     | 0.063    | –            | –      | 26.53                         | 24.83        | 19.30                          | 19.06        |
| TiTok <sub>sl256</sub> [69] | 0.063    | $\times$     | 330M   | 51.24                         | 50.72        | 44.57                          | 43.88        |
| DiffEIC [41]                | 0.063    | $\times$     | 1380M  | <b>62.19</b>                  | <b>61.93</b> | <b>54.49</b>                   | <u>54.09</u> |
| ELIC [23]                   | 0.063    | $\times$     | 34M    | 56.23                         | 54.89        | 47.39                          | 47.00        |
| FlexTok [3]                 | 0.063    | $\checkmark$ | 950M   | 57.00                         | 53.82        | 45.77                          | 46.16        |
| <b>TFGC (Ours)</b>          | 0.063    | $\checkmark$ | 332M   | <u>61.49</u>                  | <u>61.27</u> | <u>52.29</u>                   | <b>54.35</b> |
| VVC [7]                     | 0.045    | –            | –      | 21.41                         | 19.79        | 14.77                          | 14.47        |
| DiffEIC [41]                | 0.040    | $\times$     | 1380M  | <u>59.80</u>                  | <u>59.31</u> | <u>50.71</u>                   | <u>51.06</u> |
| FlexTok [3]                 | 0.035    | $\checkmark$ | 950M   | 55.15                         | 51.46        | 43.87                          | 43.56        |
| <b>TFGC (Ours)</b>          | 0.035    | $\checkmark$ | 332M   | <b>61.22</b>                  | <b>60.92</b> | <b>52.59</b>                   | <b>54.62</b> |
| VVC [7]                     | 0.023    | –            | –      | 9.78                          | 9.91         | 7.21                           | 6.06         |
| TiTok <sub>bl128</sub> [69] | 0.023    | $\times$     | 390M   | 48.86                         | 49.08        | 41.73                          | 42.06        |
| DiffEIC [41]                | 0.021    | $\times$     | 1380M  | <u>54.81</u>                  | <b>55.18</b> | <u>46.20</u>                   | <u>45.09</u> |
| FlexTok [3]                 | 0.023    | $\checkmark$ | 950M   | 54.22                         | 49.29        | 42.67                          | 41.88        |
| <b>TFGC (Ours)</b>          | 0.023    | $\checkmark$ | 332M   | <b>54.96</b>                  | <u>54.89</u> | <b>47.22</b>                   | <b>47.51</b> |

Table 9. Results on Hallucination benchmarks. “Var.” denotes whether a single model supports variable bitrate control, and “Ave. Bpp” represents the average bits per pixel across all datasets. Each group corresponds to a specific bitrate range, with bitrate variation constrained within  $\pm 0.005$  bpp. **Bold** and underlined denote the best and second-best results, respectively.

| Methods                     | Ave. Bpp | Var.         | Param. | POPE                |                     |                      |
|-----------------------------|----------|--------------|--------|---------------------|---------------------|----------------------|
|                             |          |              |        | F1-score $\uparrow$ | Accuracy $\uparrow$ | Precision $\uparrow$ |
| VVC [7]                     | 0.065    | –            | –      | 70.22               | 72.33               | 77.43                |
| TiTok <sub>sl256</sub> [69] | 0.063    | $\times$     | 330M   | 78.28               | 80.45               | <u>89.44</u>         |
| DiffEIC [41]                | 0.061    | $\times$     | 1380M  | <u>80.64</u>        | <u>82.05</u>        | 88.90                |
| ELIC [23]                   | 0.060    | $\times$     | 34M    | 79.78               | 81.38               | 88.63                |
| FlexTok [3]                 | 0.063    | $\checkmark$ | 950M   | 77.11               | 79.06               | 86.20                |
| <b>TFGC (Ours)</b>          | 0.063    | $\checkmark$ | 332M   | <b>85.96</b>        | <b>86.37</b>        | <b>89.61</b>         |
| VVC [7]                     | 0.045    | –            | –      | 66.44               | 68.46               | 72.24                |
| DiffEIC [41]                | 0.039    | $\times$     | 1380M  | <u>79.33</u>        | <u>81.20</u>        | <u>89.44</u>         |
| FlexTok [3]                 | 0.035    | $\checkmark$ | 950M   | 74.51               | 77.17               | 85.65                |
| <b>TFGC (Ours)</b>          | 0.035    | $\checkmark$ | 332M   | <b>85.94</b>        | <b>86.34</b>        | <b>89.50</b>         |
| VVC [7]                     | 0.025    | –            | –      | 61.62               | 63.17               | 65.41                |
| TiTok <sub>bl128</sub> [69] | 0.023    | $\times$     | 390M   | <u>77.34</u>        | <u>79.53</u>        | <b>88.30</b>         |
| DiffEIC [41]                | 0.021    | $\times$     | 1380M  | 75.24               | 77.95               | 84.16                |
| FlexTok [3]                 | 0.023    | $\checkmark$ | 950M   | 74.92               | 77.38               | 85.38                |
| <b>TFGC (Ours)</b>          | 0.023    | $\checkmark$ | 332M   | <b>82.57</b>        | <b>83.12</b>        | <u>86.34</u>         |

Table 10. **Results on machine-oriented benchmarks.** We also evaluate machine understanding using **InternVL3-1B** [10] as the off-the-shelf visual-language model in 0.02 bpp. “Var.” denotes whether a single model supports variable bitrate control, and “Ave. Bpp” represents the average bits per pixel across all datasets. Caption performance is evaluated on the MSCOCO, VQA performance on QKVQA, and Grounding performance using the Acc@0.5 metric. For all metrics, higher is better. **Bold** and underlined denote the best and second-best results, respectively.

| Methods                     | Ave. Bpp | Var.         | Param. | Caption      |              | Grounding    |              | VQA          |             |
|-----------------------------|----------|--------------|--------|--------------|--------------|--------------|--------------|--------------|-------------|
|                             |          |              |        | ROUGE-L      | CIDEr        | RefCOCO      | RefCOCog     | Acc          | BLEU-4      |
| VVC [7]                     | 0.025    | –            | –      | 33.57        | 12.20        | 18.50        | 13.96        | 19.24        | 4.94        |
| TiTok <sub>bl128</sub> [69] | 0.023    | $\times$     | 390M   | <u>53.84</u> | <u>99.21</u> | 62.82        | <u>57.10</u> | 32.45        | 7.79        |
| DiffEIC [41]                | 0.021    | $\times$     | 1380M  | 52.73        | 96.15        | <u>64.51</u> | 52.79        | <u>37.78</u> | <u>9.04</u> |
| FlexTok [3]                 | 0.023    | $\checkmark$ | 950M   | 51.17        | 84.26        | 57.30        | 51.92        | 29.73        | 7.22        |
| <b>TFGC (Ours)</b>          | 0.023    | $\checkmark$ | 332M   | <b>54.19</b> | <b>99.62</b> | <b>80.36</b> | <b>63.40</b> | <b>39.43</b> | <b>9.53</b> |

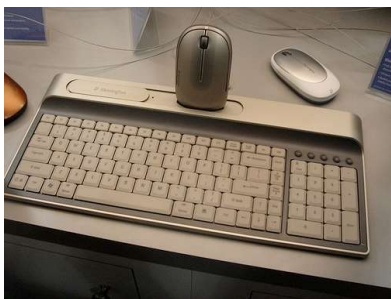

Prompt: Provide a one-sentence caption for the provided image.

VVC: A blurry view of a kitchen counter.

TiTok: A white computer mouse sits on a desk next to a beige white keyboard.

FlexTok: A silver and white computer mouse sits on a desk next to a keyboard.

ELIC: A computer with a silver-colored keyboard and a white mouse.

DiffEIC: A keyboard with a gray color scheme, placed on a desk with a mouse nearby it.

TFGC: A white keyboard on a desk. A mouse is on top of the keyboard.

Figure 9. Visualization examples of our proposed method and other baselines in the 0.06 bpp range for the image Captioning task. Model configurations are consistent with those in Table 7. Red text indicates incorrect content, green denotes correct content, and orange highlights ambiguous or unclear expressions.

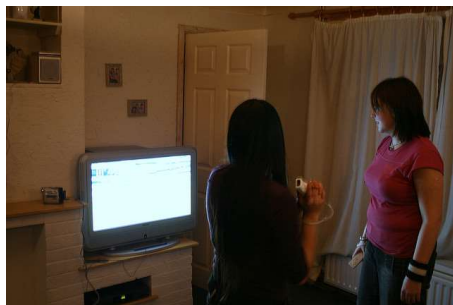

Prompt: Provide a one-sentence caption for the provided image.

VVC: A blurry shot of a room with a white light on the wall.

FlexTok: woman is standing in front of a window, looking out and adjusting the curtain.

DiffEIC: Two women are standing in a living room, facing a television screen.

TFGC: A woman is playing a video game on a computer, while the other stands beside her.

Figure 10. Visualization examples of our proposed method and other baselines in the 0.04 bpp range for the image Captioning task. Model configurations are consistent with those in Table 7. Red text indicates incorrect content, green denotes correct content, and orange highlights ambiguous or unclear expressions.

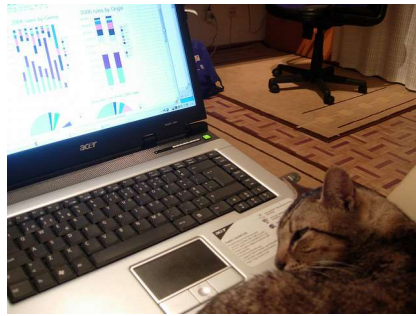

Prompt: Provide a one-sentence caption for the provided image.

VVC: **A man is sitting in front of a computer.**

TiTok: A cat is lying **on a beige rug** in front of a laptop computer.

FlexTok: A cat is **sitting on** a laptop keyboard, **looking at the screen.**

DiffEIC: **A person** is sitting on a bed, working on a laptop with a tablet in front of them.

TFGC: A cat is **laying on a keyboard** and mouse.

Figure 11. Visualization examples of our proposed method and other baselines in the 0.02 bpp range for the image Captioning task. Model configurations are consistent with those in Table 7. Red text indicates incorrect content, green denotes correct content, and orange highlights ambiguous or unclear expressions.

Prompt: Please provide the bounding box coordinate of the region this sentence describes: bowl on right.

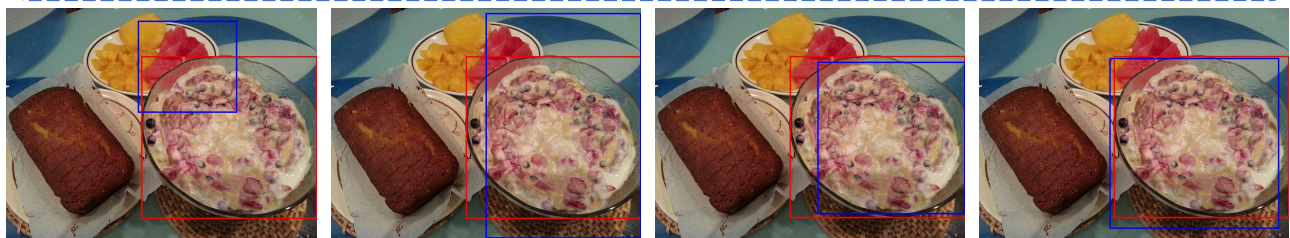

VVC: 0.1668

DiffEIC: 0.6610

FlexTok: 0.7922

TFGC: 0.8554

Figure 12. Visualization examples of our proposed method and other baselines in the 0.04 bpp range for the image Grounding task. Model configurations are consistent with those in Table 7. The red box denotes the GT bounding box, the blue box represents the predicted box, and the IoU [17] values are reported in the figure.

Prompt: Please provide the bounding box coordinate of the region this sentence describes: a man in a red shirt.

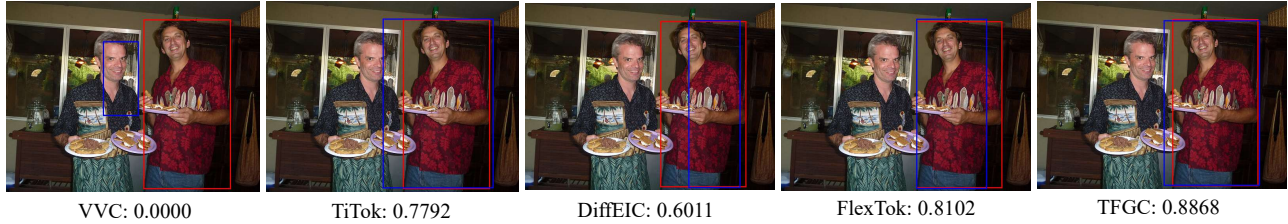

Figure 13. Visualization examples of our proposed method and other baselines in the 0.02 bpp range for the image Grounding task. Model configurations are consistent with those in Table 7. The red box denotes the GT bounding box, the blue box represents the predicted box, and the IoU [17] values are reported in the figure.

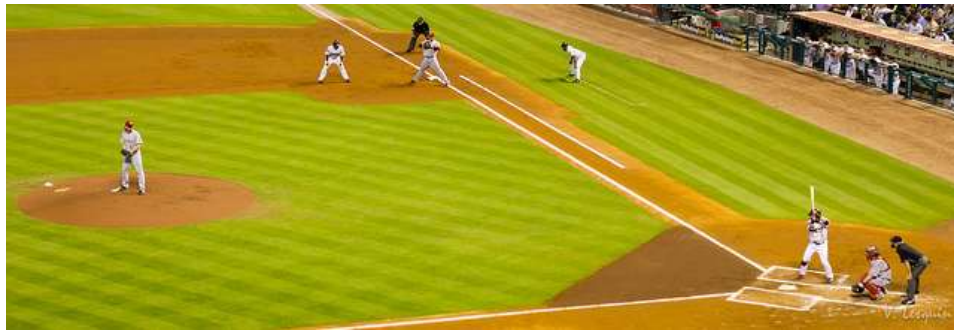

Question: How likely is it that the batter will hit a home run?      Answer: not likely

VVC: **very**      TiTok: **very**      Flextok: **very**      ELIC: **very**      DiffEIC: **very**      TFGC: **not likely**

Figure 14. Visualization examples of our proposed method and other baselines in the 0.06 bpp range for the image VQA task. Model configurations are consistent with those in Table 7.

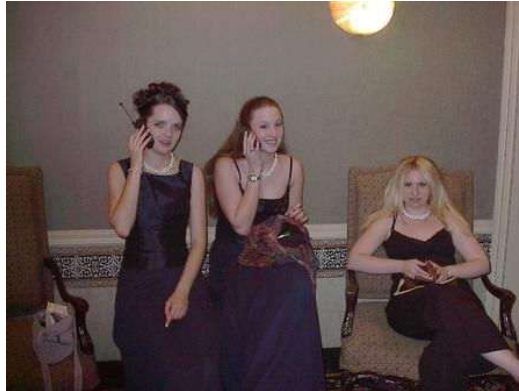

Question: What room of the house is this?

Answer: living room

VVC: kitchen

FlexTok: dining room

DiffEIC: dining room

TFGC: living room

Figure 15. Visualization examples of our proposed method and other baselines in the 0.04 bpp range for the image VQA task. Model configurations are consistent with those in Table 7.

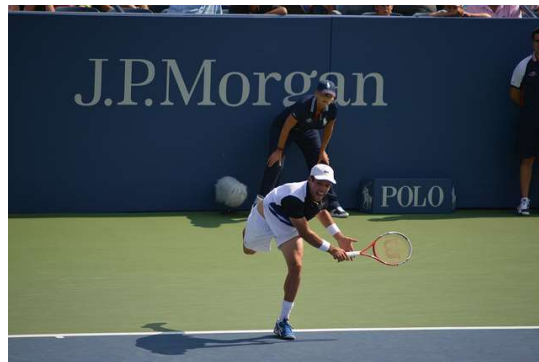

Question: Is there a ball in this photo?

Answer: no

VVC: yes

TiTok: yes

FlexTok: yes

DiffEIC: yes

TFGC: no

Figure 16. Visualization examples of our proposed method and other baselines in the 0.02 bpp range for the image VQA task. Model configurations are consistent with those in Table 7.

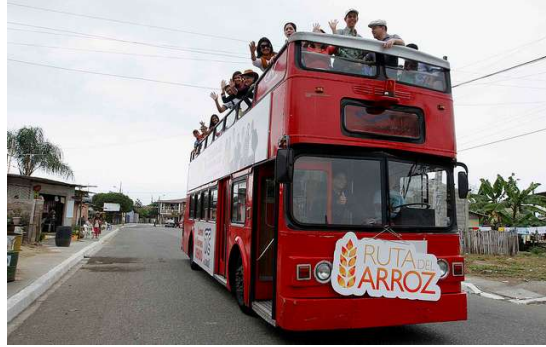

Question: Is there an orange in the imange?

Answer: no

VVC: **yes**

TiTok: **yes**

Flextok: **yes**

ELIC: **yes**

DiffEIC: **yes**

TFGC: **no**

Figure 17. Visualization examples of our proposed method and other baselines in the 0.06 bpp range for the Hallucination effects. Model configurations are consistent with those in Table 7.

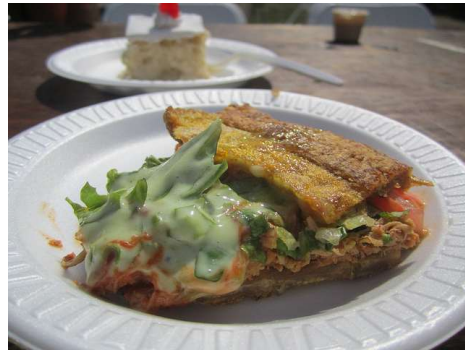

Question: Is there a knife in the image?

Answer: yes

VVC: **no**

Flextok: **no**

DiffEIC: **no**

TFGC: **yes**

Figure 18. Visualization examples of our proposed method and other baselines in the 0.04 bpp range for the Hallucination effects. Model configurations are consistent with those in Table 7.

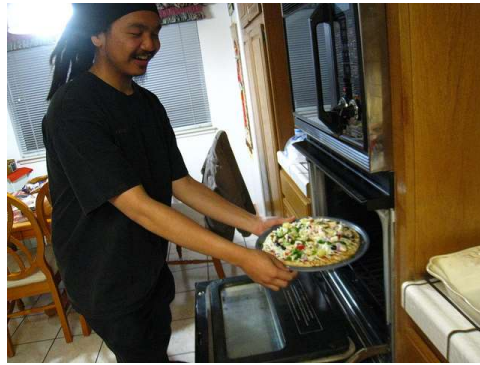

Question: Is there a couch in the image?

Answer: no

VVC: **yes**

TiTok: **yes**

Flextok: **yes**

DiffEIC: **yes**

TFGC: **no**

Figure 19. Visualization examples of our proposed method and other baselines in the 0.02 bpp range for the Hallucination effects. Model configurations are consistent with those in Table 7.
